# Supplementary material for: Expression and Anthocyanin Biosynthesis-Modulating Potential of Sweet Cherry (Prunus avium L.) MYB10 and bHLH Genes
Source: PubMed Central journal article supplement (PMC4433224; doi:10.1371/journal.pone.0126991), 2015-05-15
Supplement: pone.0126991.s003.pdf [file pone.0126991.s003.pdf]

## Gene abbreviations

| Abbreviation | Gene/cDNA | Species              | Cultivar                          |
|--------------|-----------|----------------------|-----------------------------------|
| PAP1         | cDNA      | Arabidopsis thaliana |                                   |
| ANT1*        | cDNA      | Solanum lycopersicum | mutant D72N                       |
| GFP          | cDNA      | Aequorea victoria    |                                   |
| PaWD40       | gene      | Prunus avium         | Irema BS                          |
| PaHLH3       | cDNA      | Prunus avium         | Kitayanka                         |
| PaHLH33      | cDNA      | Prunus avium         | Irema BS                          |
| MYB10.1-1k   | cDNA      | Prunus avium         | Kitayanka                         |
| MYB10.1-1    | gene      | Prunus avium         | Irema BS                          |
| MYB10.1-2    | gene      | Prunus avium         | Regina                            |
| MYB10.1-3    | gene      | Prunus avium         | Irema BS                          |
| MYB10.1-3k   | cDNA      | Prunus avium         | Irema BS gene->N.benthamiana cDNA |
| MYB10.1-3a   | gene      | Prunus avium         | Werdersche braune                 |

Table of infiltrated genes – on the top or on the side of the leaf (leaves).  
 In the left column - infiltrated genes on the left side of a single leaf.  
 In the right column - infiltrated genes on the right side of a single leaf.  
 Leaves bordered without gaps are infiltrated exactly the same and share the same table.

# Single genes

|            |         |
|------------|---------|
| GFP        | PaHLH3  |
| MYB10.1-2  | PaHLH33 |
| MYB10.1-1k | PaWD40  |
| MYB10.1-3  | PAP1    |

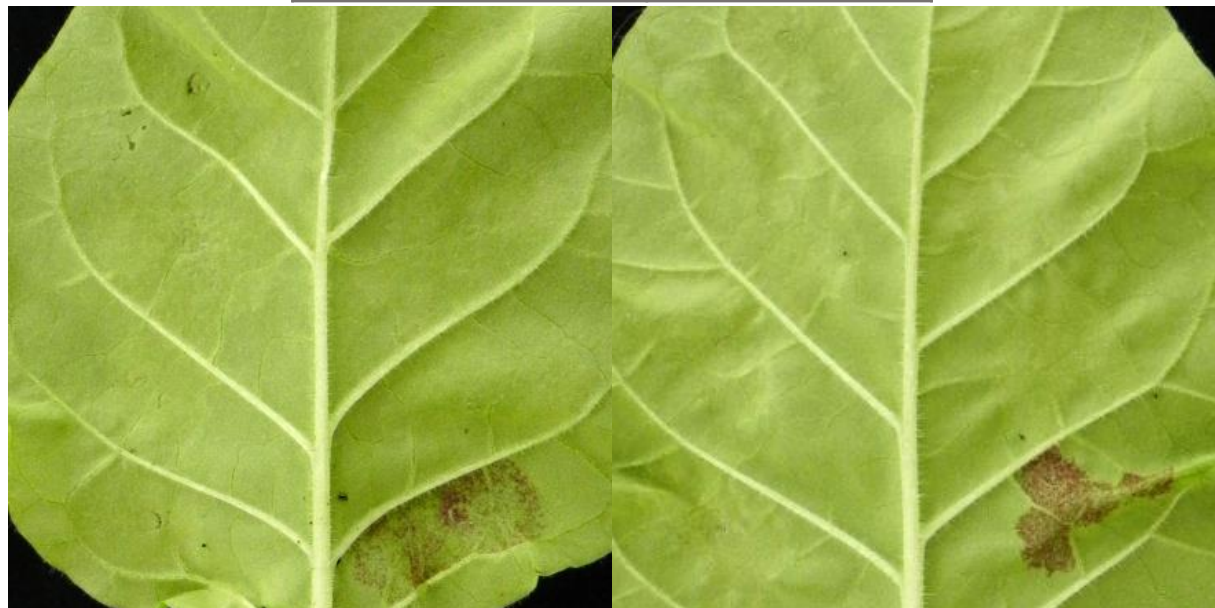

|       |            |
|-------|------------|
| GFP   | MYB10.1-2  |
|       | MYB10.1-1k |
| ANT1* | MYB10.1-3  |

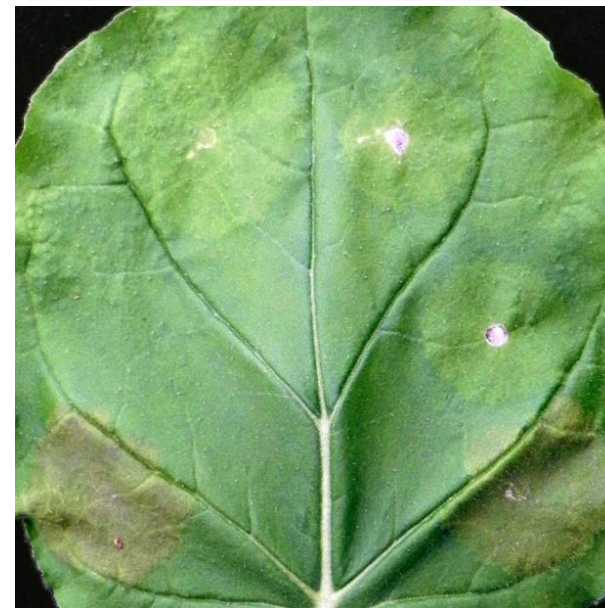

|       |           |
|-------|-----------|
| ANT1* | PaHLH3    |
| GFP   | PaHLH33   |
| PAP1  | MYB10.1-3 |

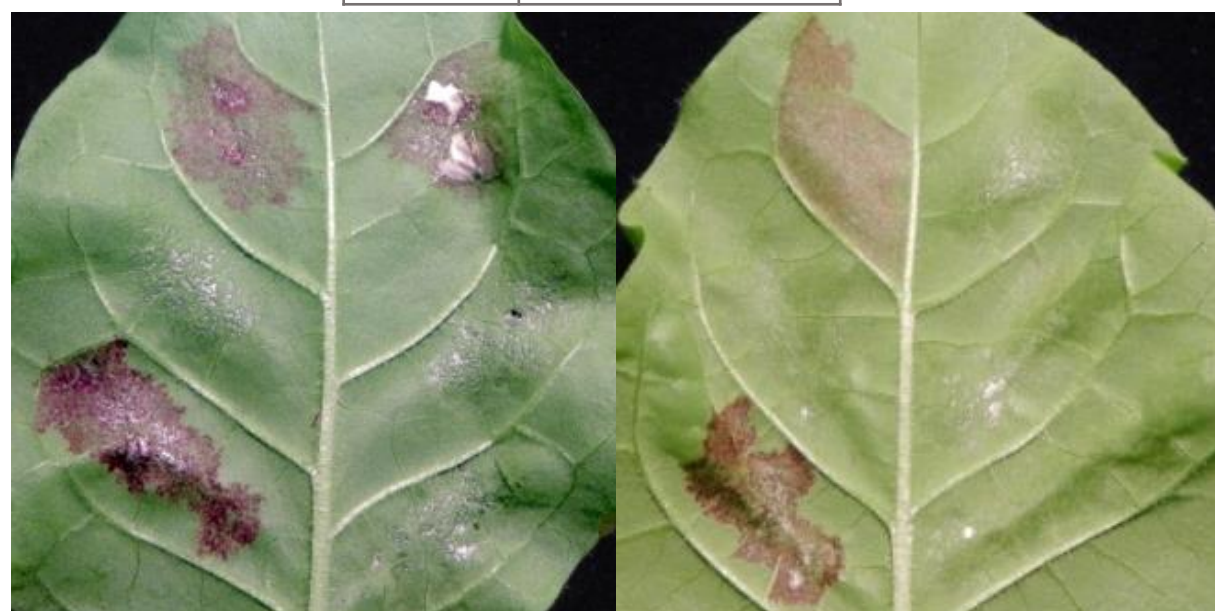

|       |            |
|-------|------------|
| PAP1  | GFP        |
| GFP   | MYB10.1-1k |
| ANT1* | MYB10.1-2  |

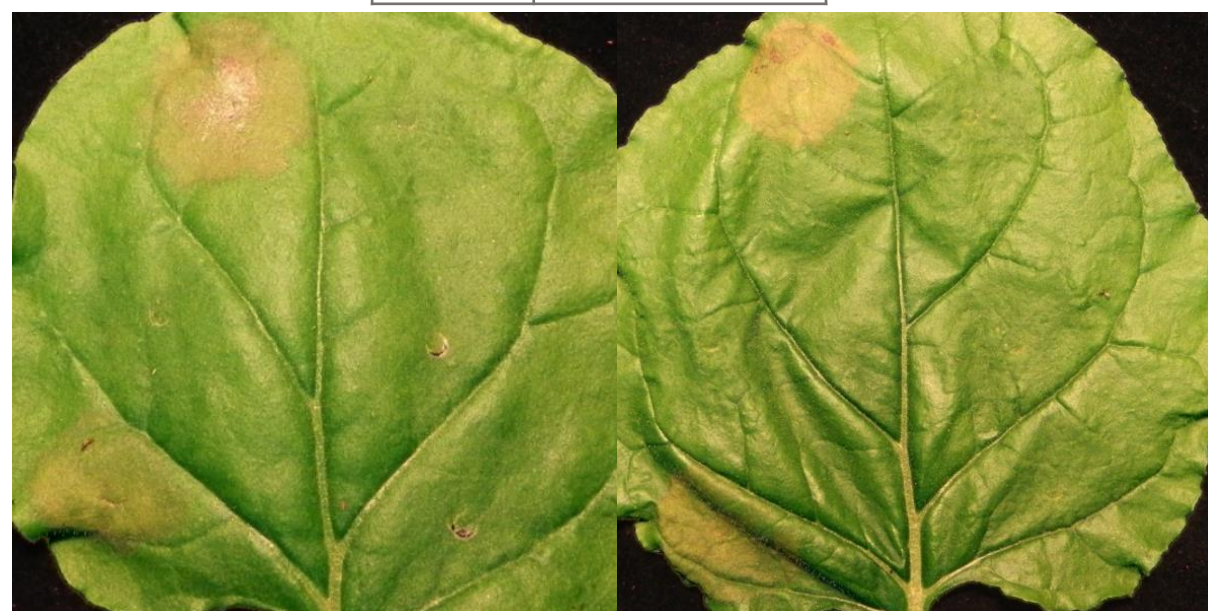

|       |            |
|-------|------------|
| PAP1  | GFP        |
| GFP   | MYB10.1-1k |
| ANT1* | MYB10.1-2  |

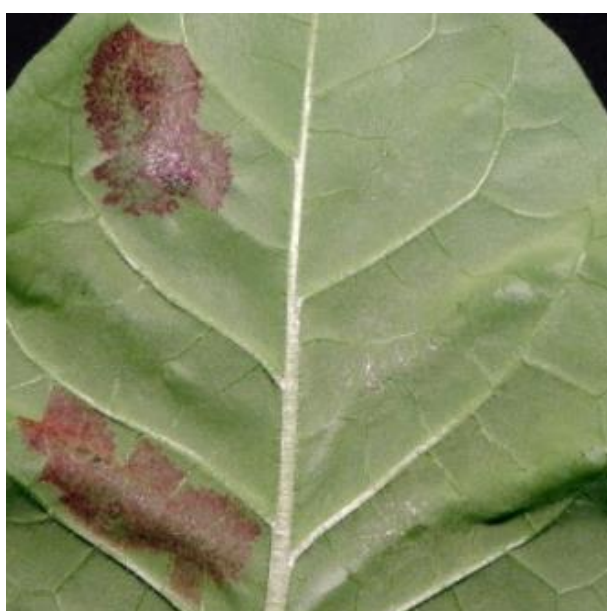

|           |       |
|-----------|-------|
| ANT1*+GFP | ANT1* |
| GFP+GFP   | GFP   |
| PAP1+GFP  | PAP1  |

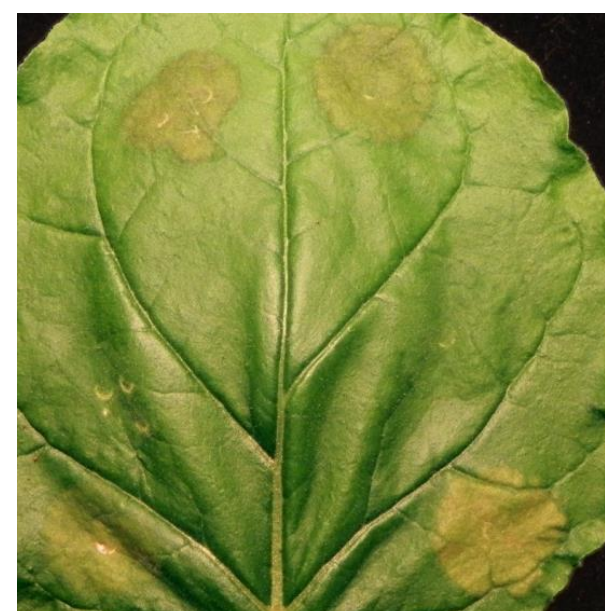

*Nicotiana tabacum*

*Nicotiana benthamiana*

## PaHLH3 - PaHLH33

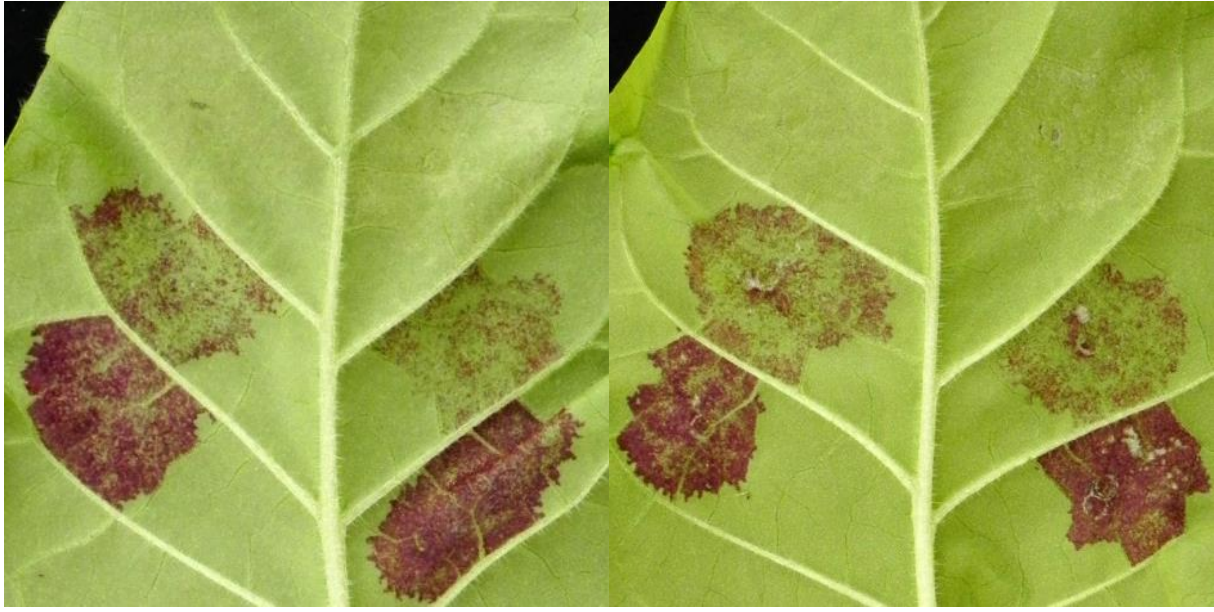

|              |                     |
|--------------|---------------------|
| PAP1+PaHLH33 | PAP1+PaHLH33+PaWD40 |
| PAP1         | PAP1+PaWD40         |
| PAP1+PaHLH3  | PAP1+PaHLH3+PaWD40  |

|                     |              |
|---------------------|--------------|
| PAP1+PaHLH33+PaWD40 | PAP1+PaHLH33 |
| PAP1+PaWD40         | PAP1         |
| PAP1+PaHLH3+PaWD40  | PAP1+PaHLH3  |

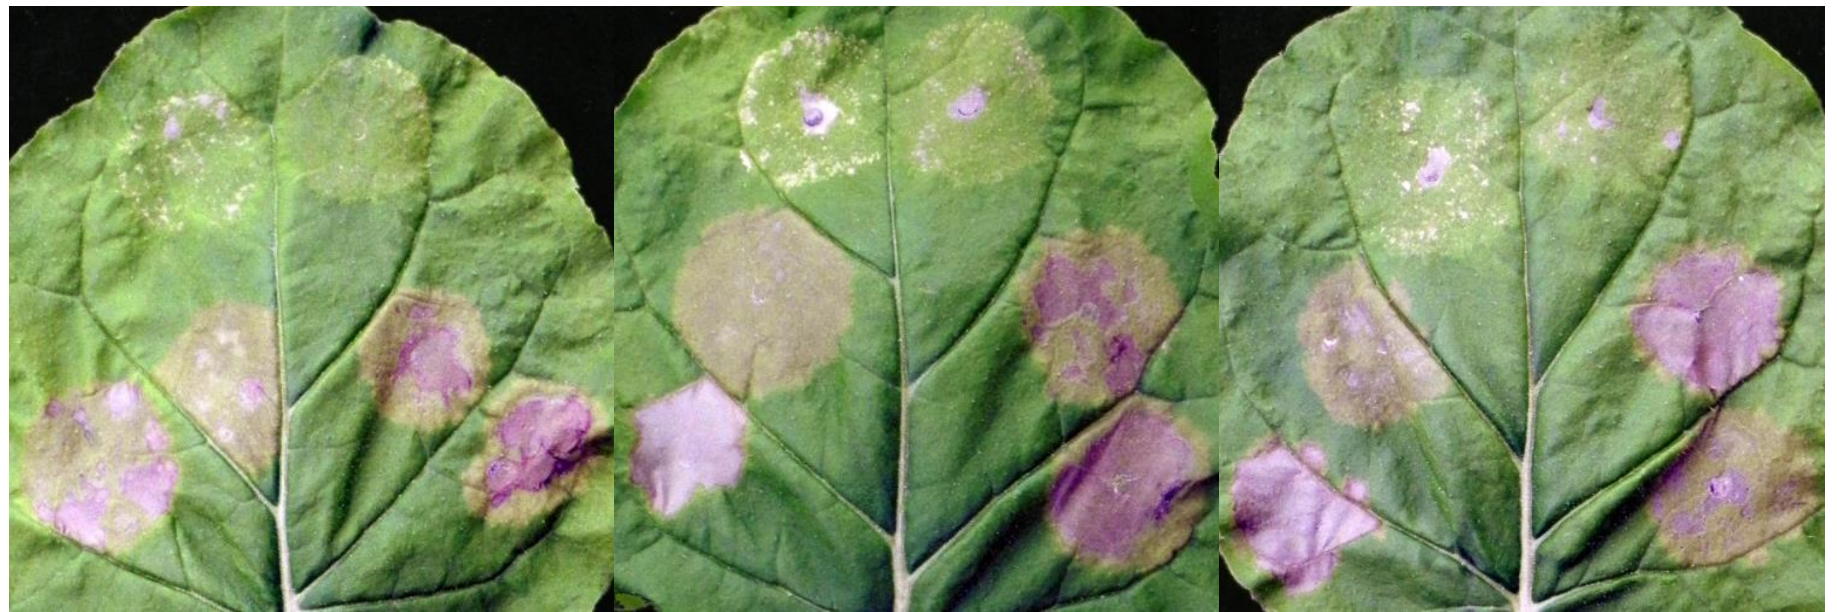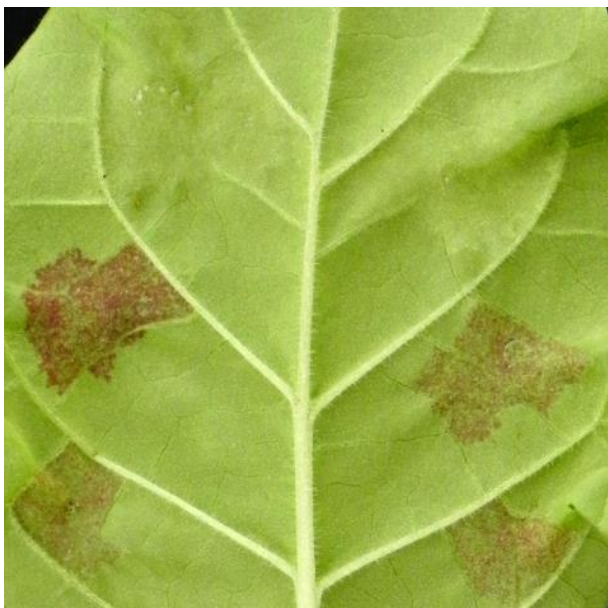

|               |                      |
|---------------|----------------------|
| ANT1*+PaHLH33 | ANT1*+PaHLH33+PaWD40 |
| ANT1*+PaHLH3  | ANT1*+PaHLH3+PaWD40  |
| ANT1*         | ANT1*+PaWD40         |

|                      |               |
|----------------------|---------------|
| ANT1*+PaHLH33+PaWD40 | ANT1*+PaHLH33 |
| ANT1*+PaWD40         | ANT1*         |
| ANT1*+PaHLH3+PaWD40  | ANT1*+PaHLH3  |

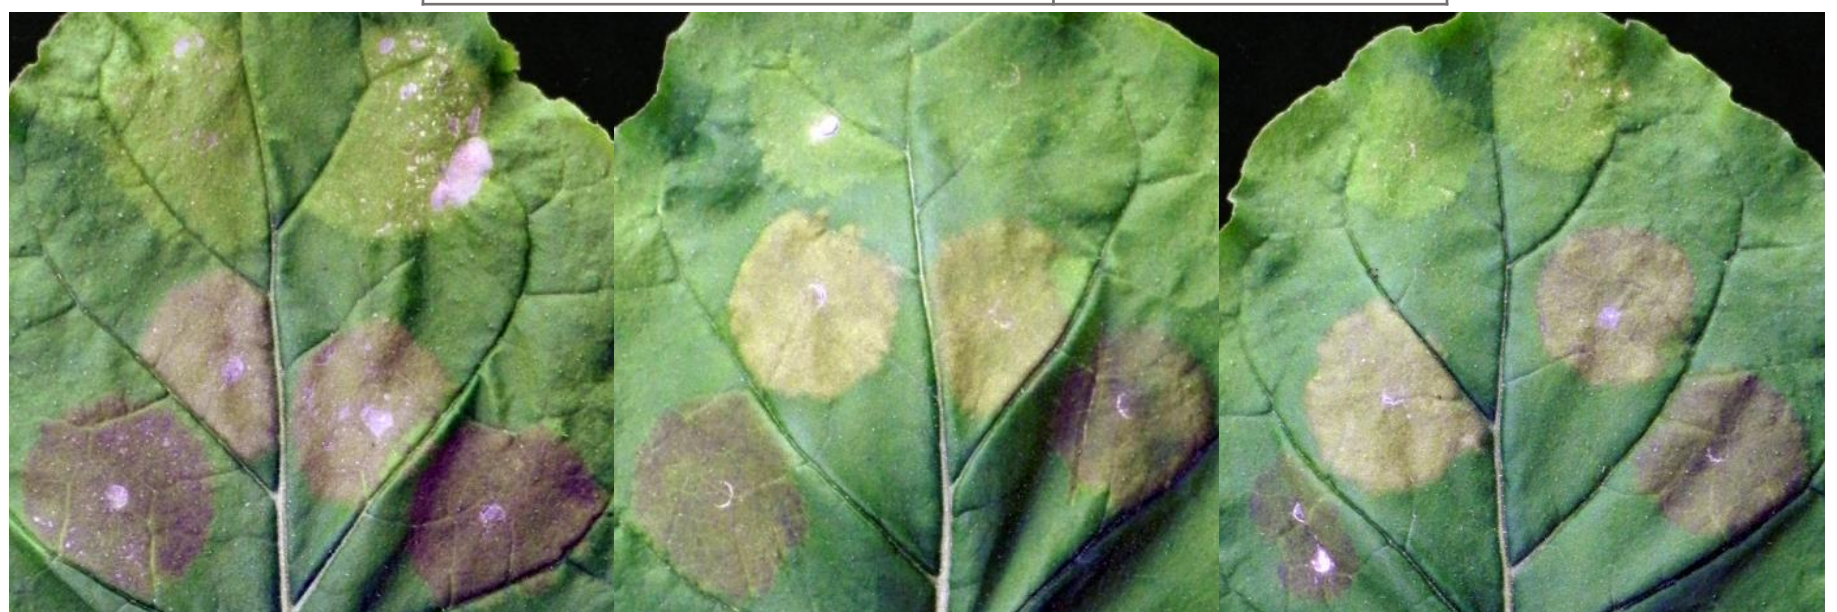

*Nicotiana tabacum*

*Nicotiana benthamiana*

## PaMYB10.1-1k - PaMYB10.1-1

|            |                    |
|------------|--------------------|
| MYB10.1-1k | MYB10.1-1k+PaHLH3  |
| GFP        | MYB10.1-1k+GFP     |
| PAP1       | MYB10.1-1k+PaHLH33 |

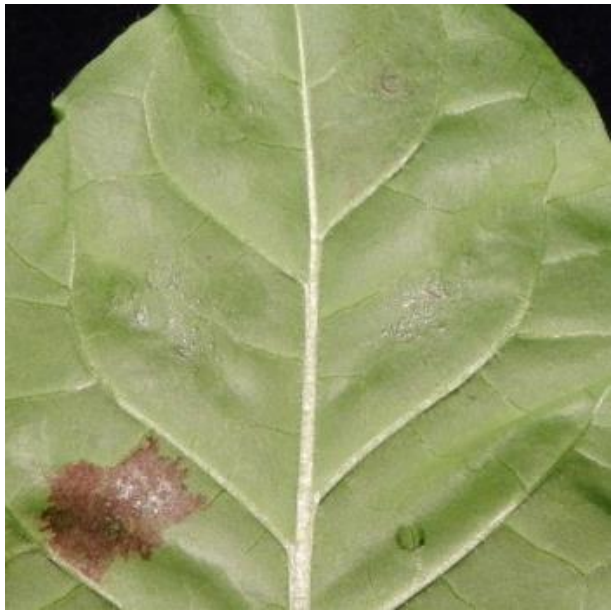

|            |                    |
|------------|--------------------|
| MYB10.1-1k | MYB10.1-1k+PaHLH3  |
| GFP        | MYB10.1-1k+GFP     |
| PAP1       | MYB10.1-1k+PaHLH33 |

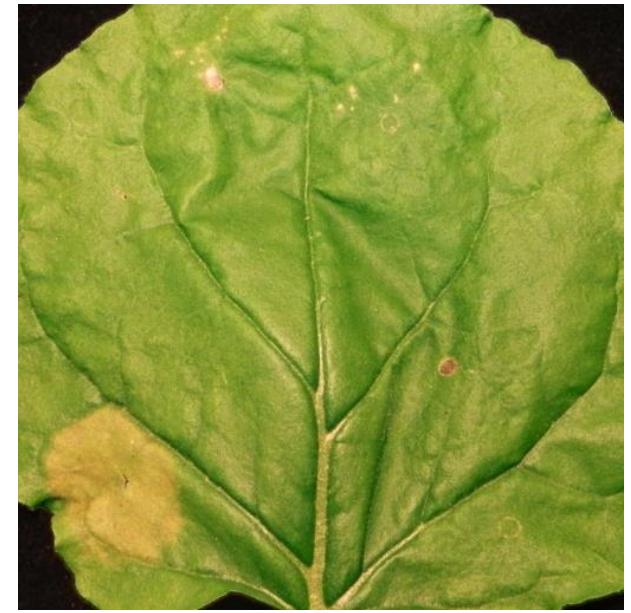

|           |                  |
|-----------|------------------|
| MYB10.1-1 | MYB10.1-1+PaHLH3 |
| ANT1*     | ANT1*+PaHLH3     |
| PAP1      | PAP1+PaHLH3      |

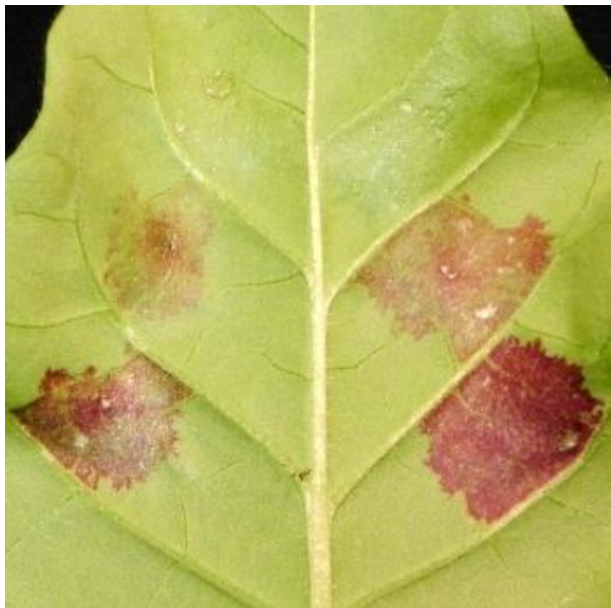

|                           |                    |
|---------------------------|--------------------|
| MYB10.1-1k+PaHLH33+PaWD40 | MYB10.1-1k+PaHLH33 |
| MYB10.1-1k+PaWD40         | MYB10.1-1k         |
| MYB10.1-1k+PaHLH33+PaWD40 | MYB10.1-1k+PaHLH3  |

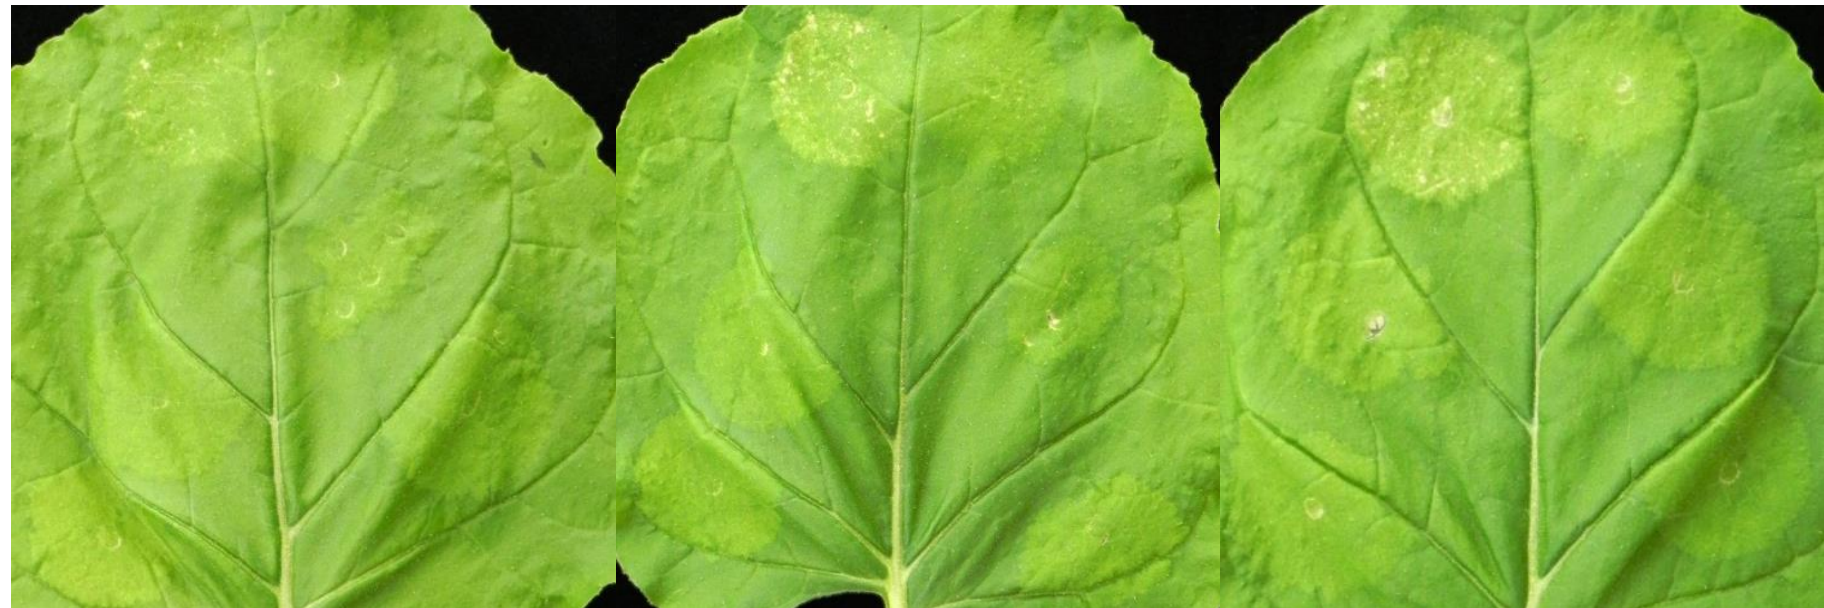

*Nicotiana tabacum*

*Nicotiana benthamiana*

## PaMYB10.1-2

|                   |                          |
|-------------------|--------------------------|
| MYB10.1-2+PaHLH33 | MYB10.1-2+PaHLH33+PaWD40 |
| MYB10.1-2         | MYB10.1-2+PaWD40         |
| MYB10.1-2+PaHLH3  | MYB10.1-2+PaHLH3+PaWD40  |
| GFP+PaHLH3        | PAP1+PaHLH3              |

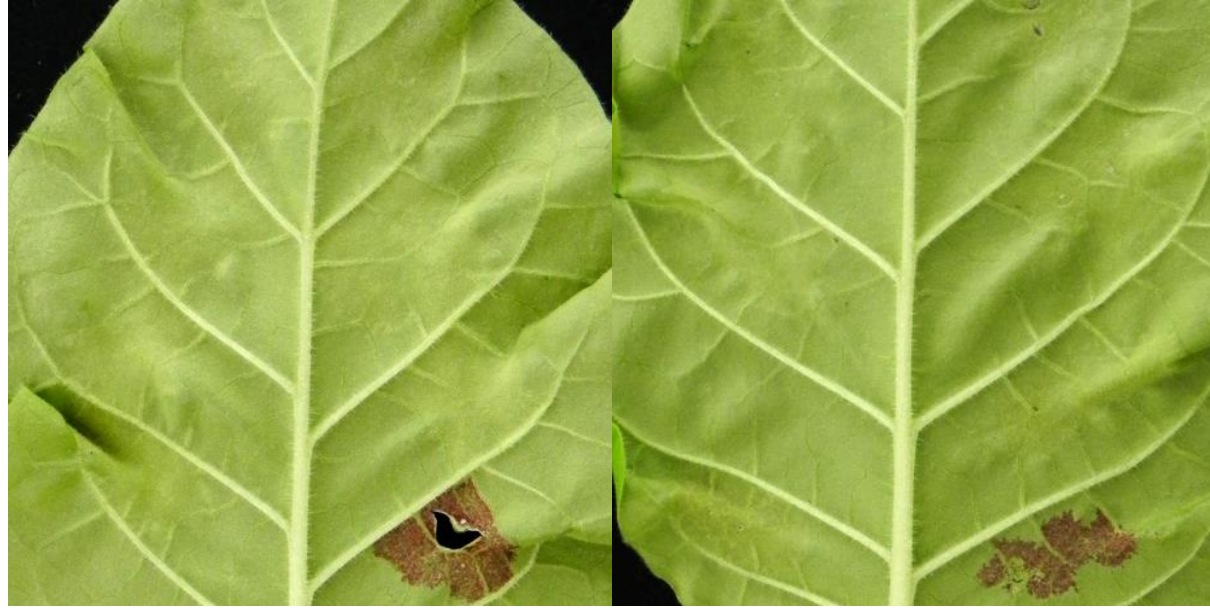

|                          |                   |
|--------------------------|-------------------|
| MYB10.1-2+PaHLH33+PaWD40 | MYB10.1-2+PaHLH33 |
| MYB10.1-2+PaWD40         | MYB10.1-2         |
| MYB10.1-2+PaHLH3+PaWD40  | MYB10.1-2+PaHLH3  |

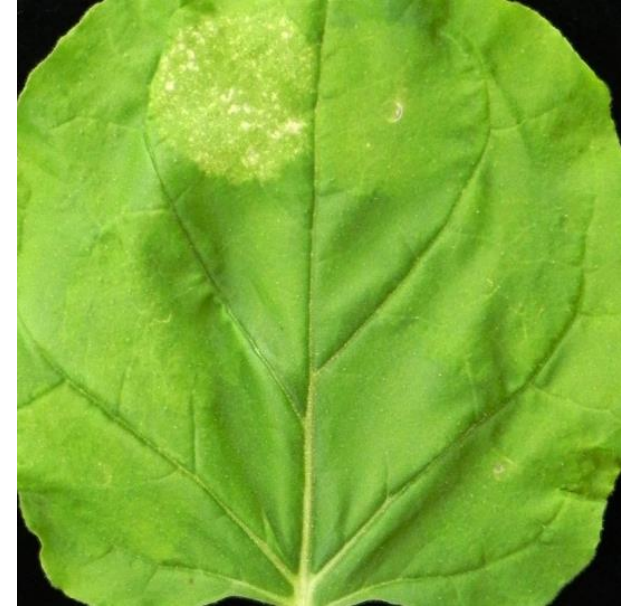

|           |                   |
|-----------|-------------------|
| MYB10.1-2 | MYB10.1-2+PaHLH3  |
| GFP       | MYB10.1-2+GFP     |
| PAP1      | MYB10.1-2+PaHLH33 |

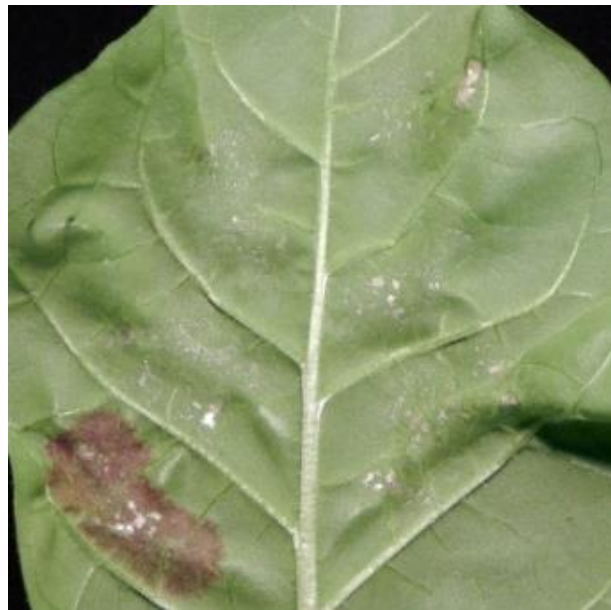

|           |                   |
|-----------|-------------------|
| MYB10.1-2 | MYB10.1-2+PaHLH3  |
| GFP       | MYB10.1-2+GFP     |
| PAP1      | MYB10.1-2+PaHLH33 |

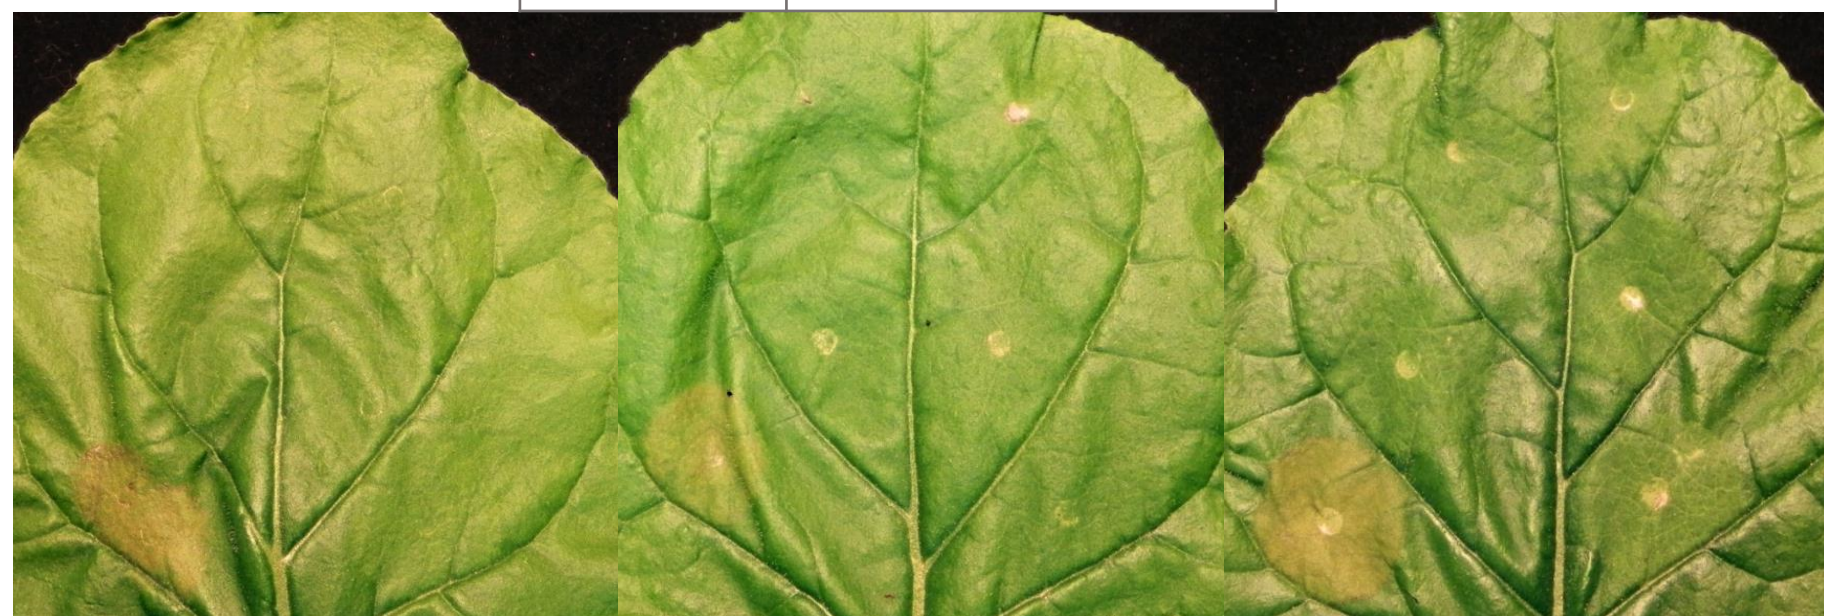

*Nicotiana tabacum*

*Nicotiana benthamiana*

# PaMYB10.1-3

|                   |                          |
|-------------------|--------------------------|
| MYB10.1-3+PaHLH33 | MYB10.1-3+PaHLH33+PaWD40 |
| MYB10.1-3         | MYB10.1-3+PaWD40         |
| MYB10.1-3+PaHLH3  | MYB10.1-3+PaHLH3+PaWD40  |
| ANT1*             | PAP1                     |

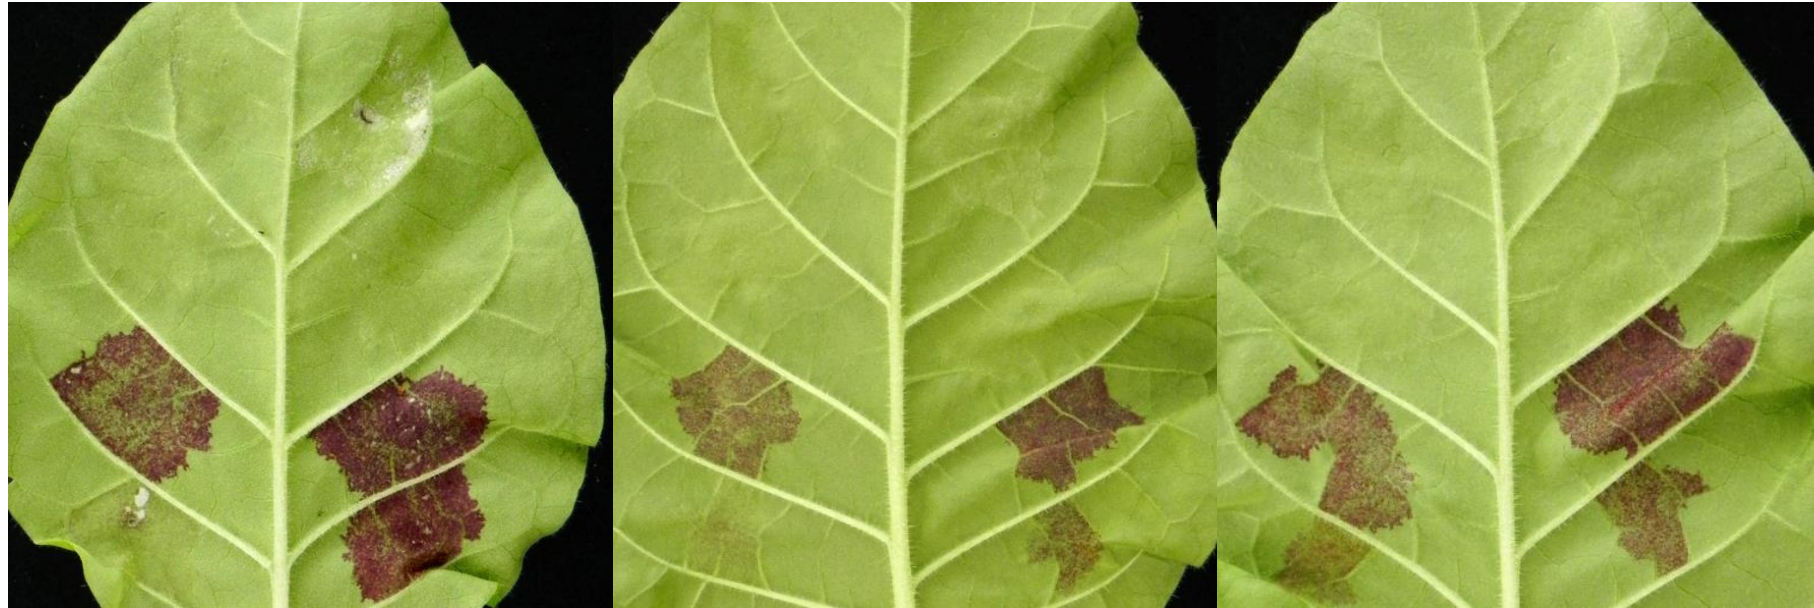

|                          |                   |
|--------------------------|-------------------|
| MYB10.1-3+PaHLH33+PaWD40 | MYB10.1-3+PaHLH33 |
| MYB10.1-3+PaWD40         | MYB10.1-3         |
| MYB10.1-3+PaHLH3+PaWD40  | MYB10.1-3+PaHLH3  |

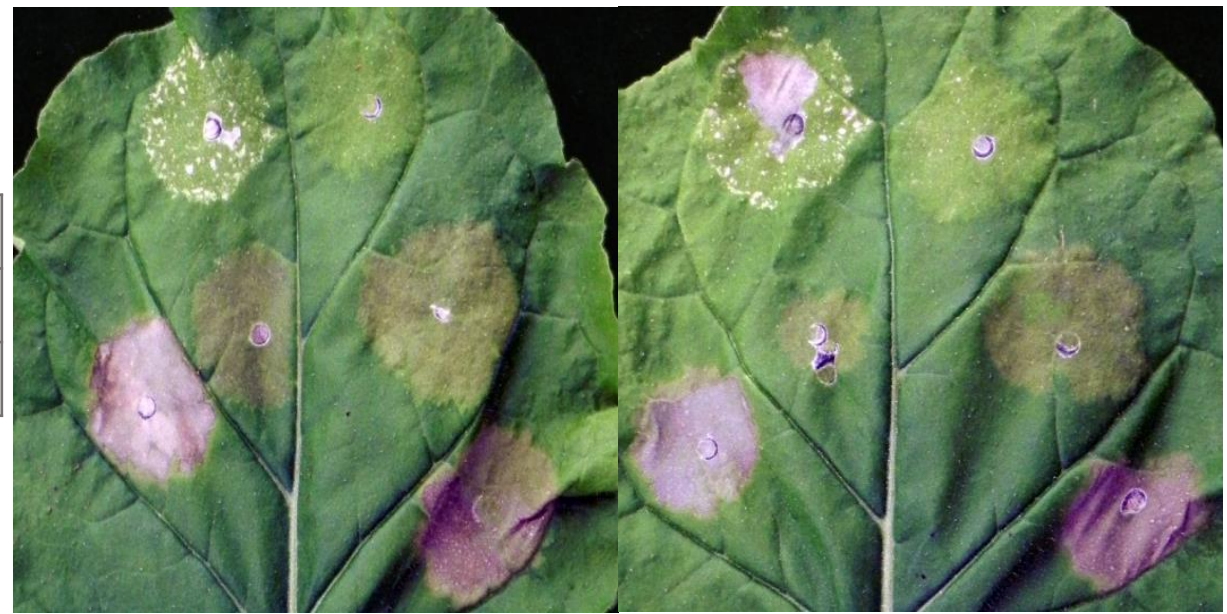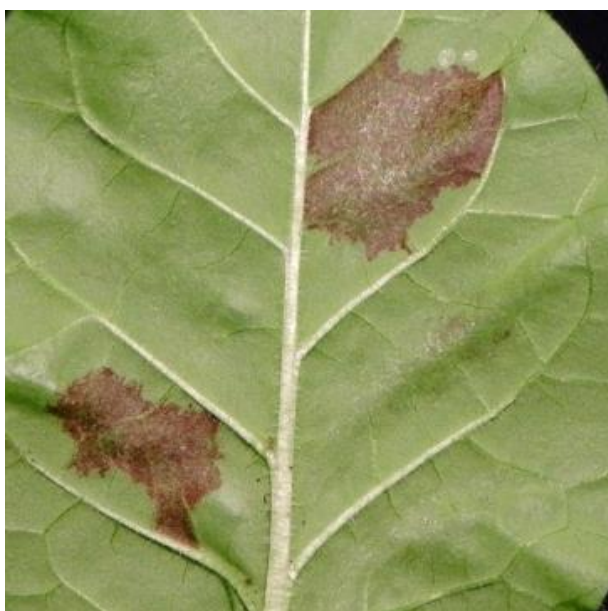

|           |                   |
|-----------|-------------------|
| MYB10.1-3 | MYB10.1-3+PaHLH3  |
| GFP       | MYB10.1-3+GFP     |
| PAP1      | MYB10.1-3+PaHLH33 |

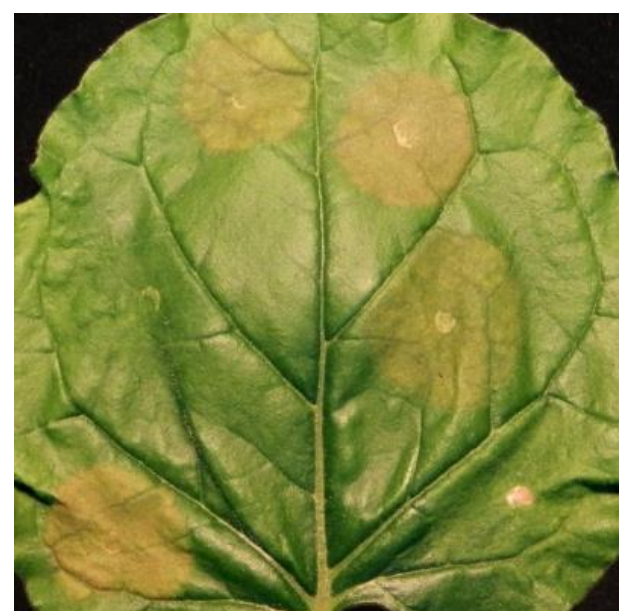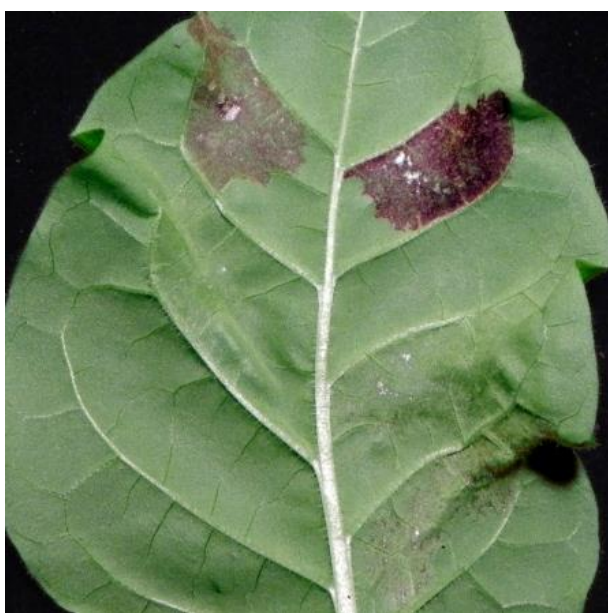

|      |                          |
|------|--------------------------|
| ANT* | ANT*+PAP1                |
| GFP  | PaHLH3+PaHLH33           |
|      | MYB10.1-3+PaHLH3+PaHLH33 |

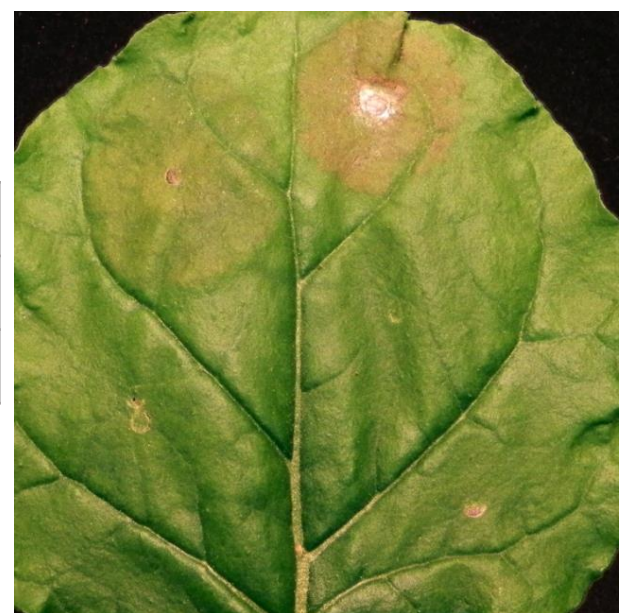

*Nicotiana tabacum*

*Nicotiana benthamiana*

# PaMYB1-1 - PaMYB10.1-3 - PaMYB10.1-3k

|            |                   |
|------------|-------------------|
| MYB10.1-3  | MYB10.1-3+PaHLH3  |
| MYB10.1-3k | MYB10.1-3k+PaHLH3 |
| PAP1       | PAP1+PaHLH3       |

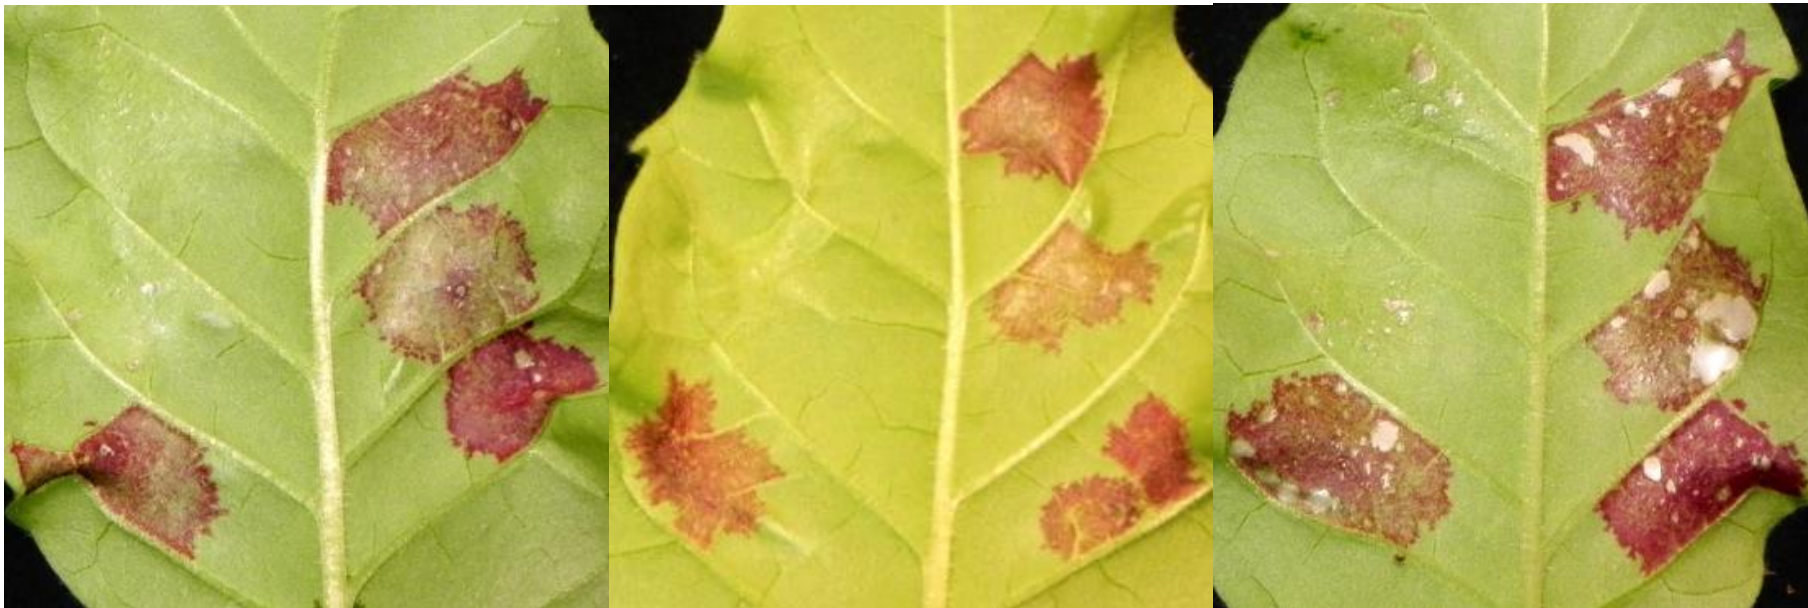

|            |                   |
|------------|-------------------|
| MYB10.1-1  | MYB10.1-1+PaHLH3  |
| MYB10.1-3k | MYB10.1-3k+PaHLH3 |
| ANT1*      | ANT1*+PaHLH3      |

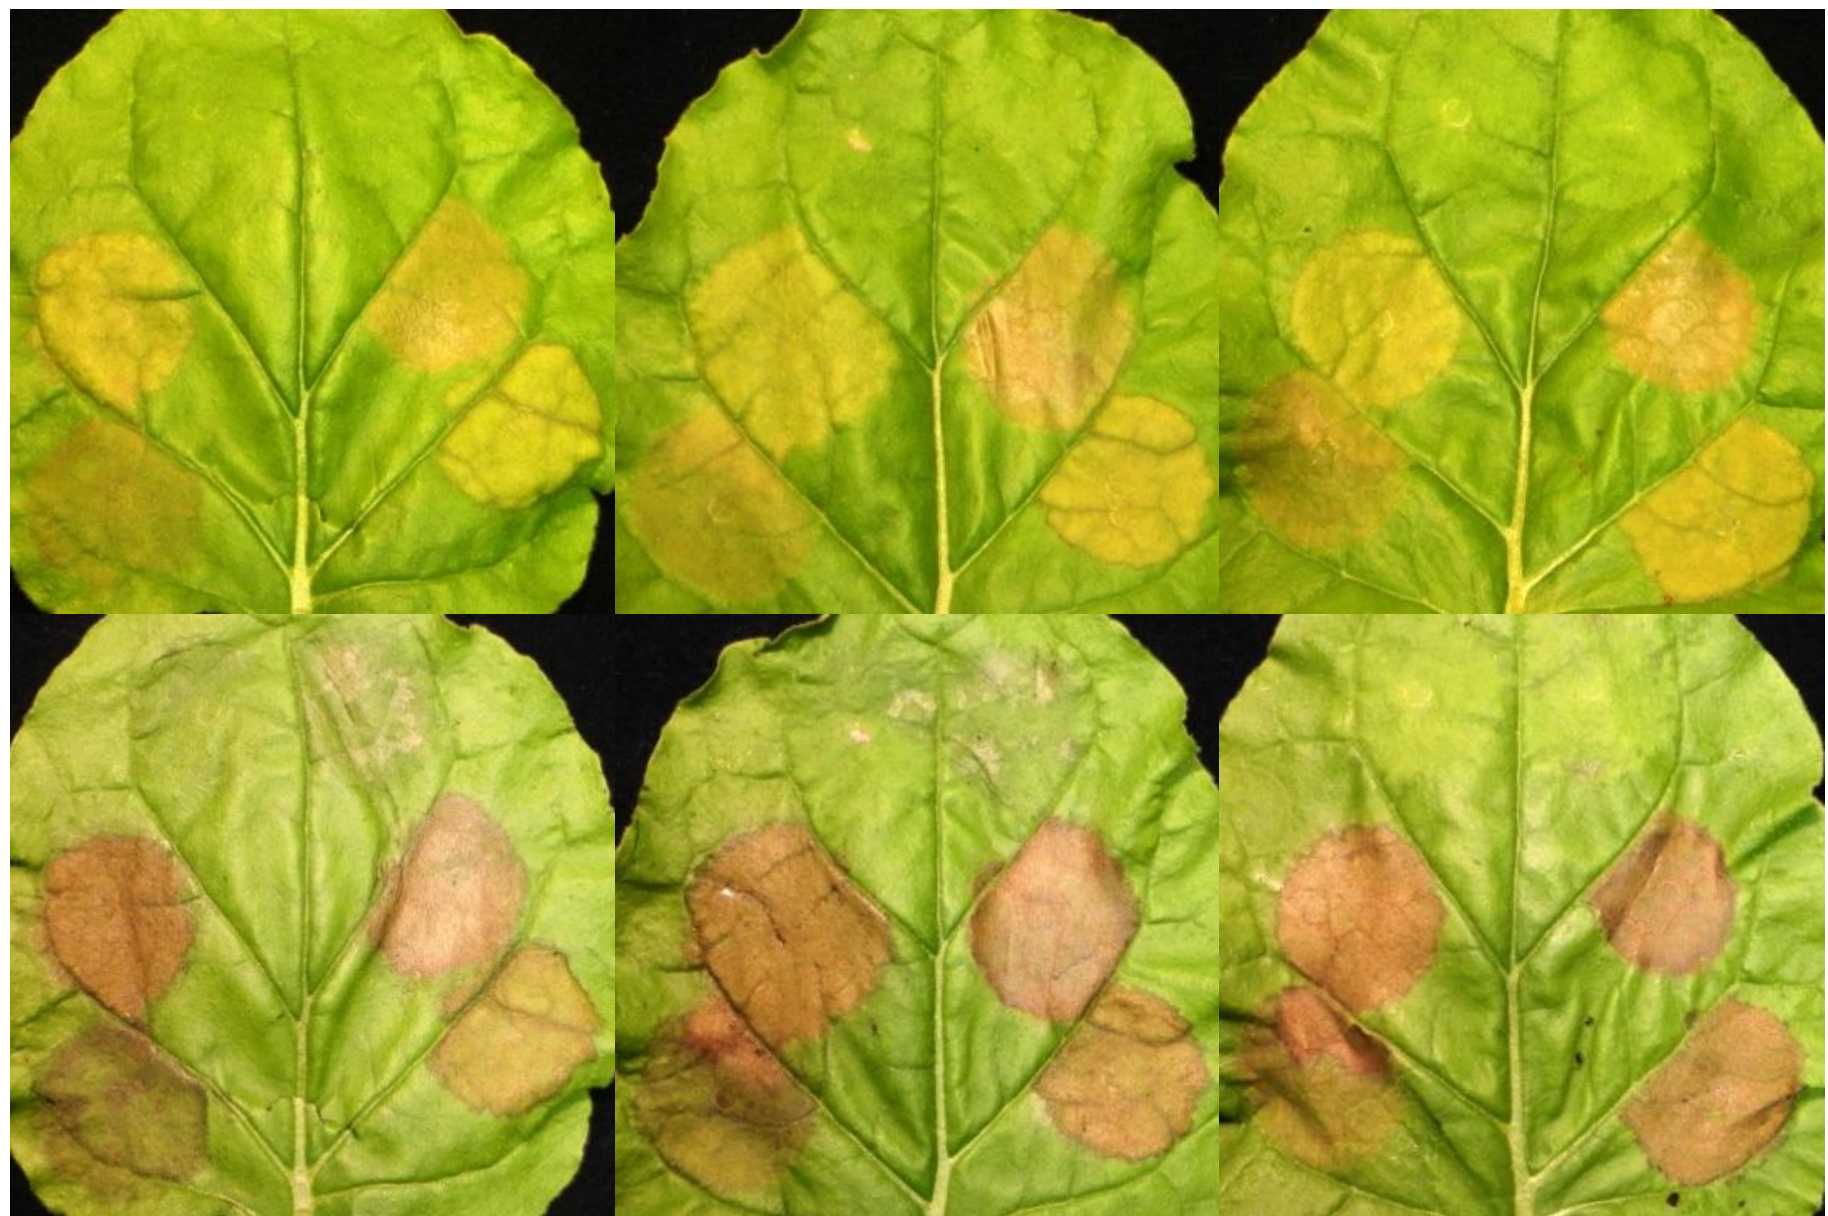

After storage  
at 7°C

*Nicotiana tabacum*

*Nicotiana benthamiana*

# PaMYB10.1-3 - PaMYB10.1-3k – PaMYB1-3a

|                         |                          |
|-------------------------|--------------------------|
| PaHLH3                  | PaHLH33                  |
| GFP                     | MYB10.1-3+PaWD40         |
| MYB10.1-3+PaHLH3+PaWD40 | MYB10.1-3+PaHLH33+PaWD40 |
| MYB10.1-3+PaHLH3        | MYB10.1-3+PaHLH33        |
| PAP1                    | MYB10.1-3                |

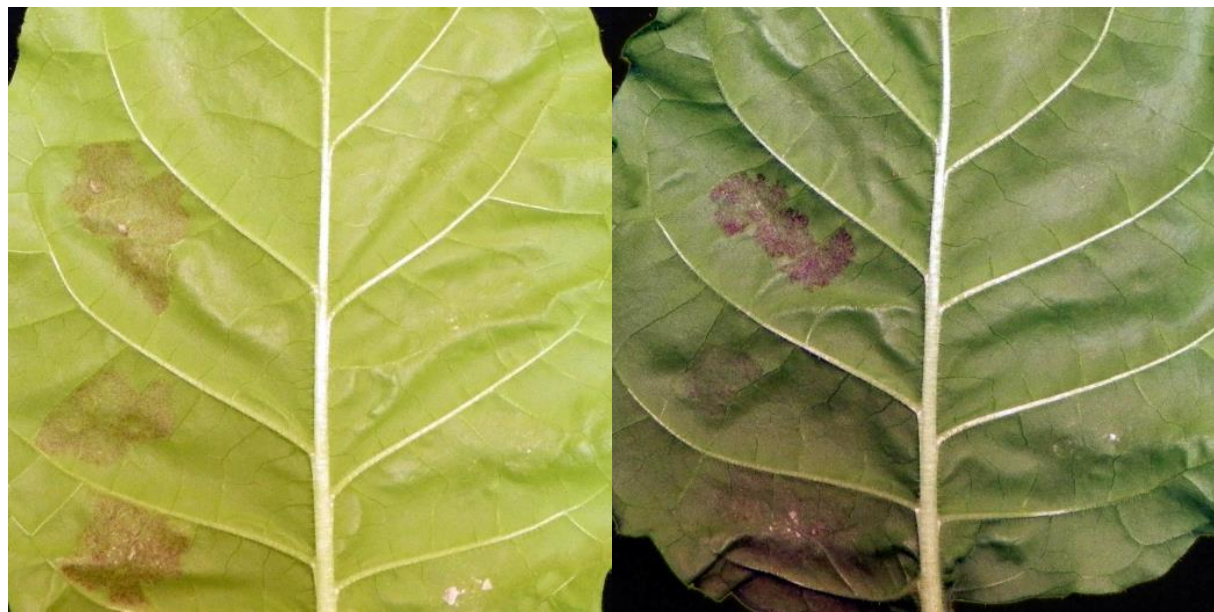

|            |                   |
|------------|-------------------|
| MYB10.1-3a | MYB10.1-3a+PaHLH3 |
|------------|-------------------|

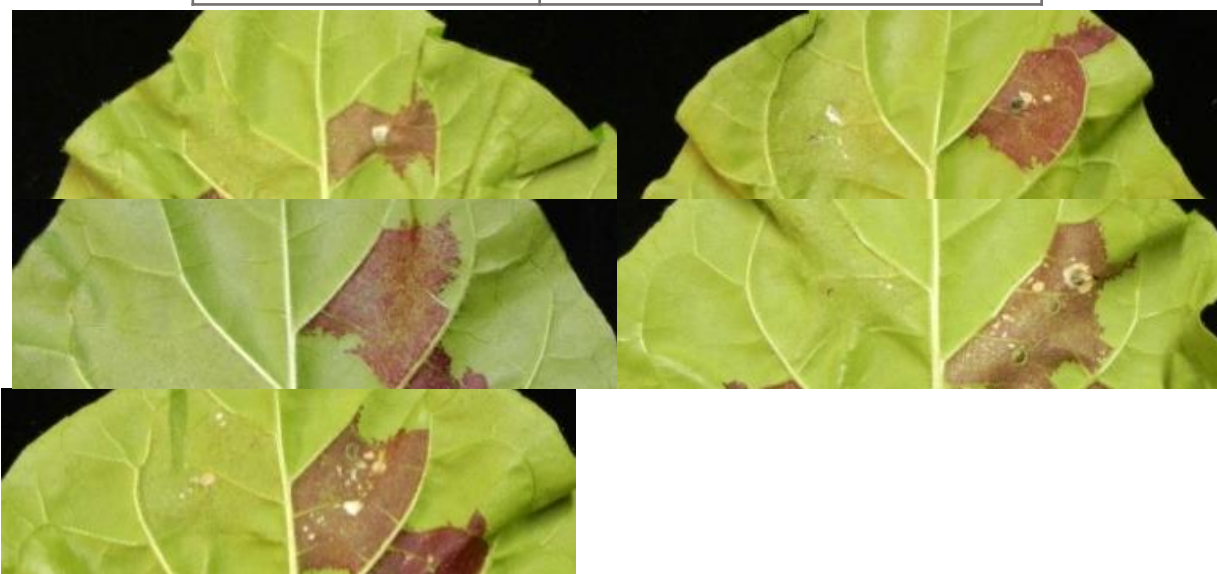

*Nicotiana tabacum*

|     |                |
|-----|----------------|
| GFP | MYB10.1-3k+GFP |
|     | PAP1           |

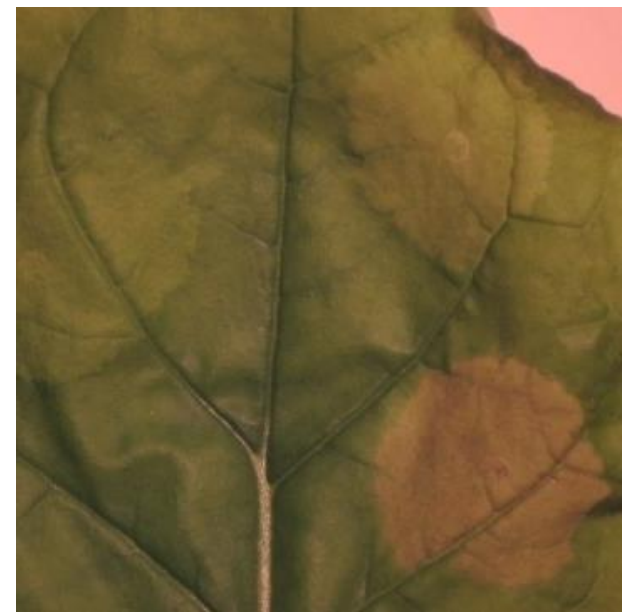

|           |            |
|-----------|------------|
|           | MYB10.1-3k |
| MYB10.1-3 | PAP1       |

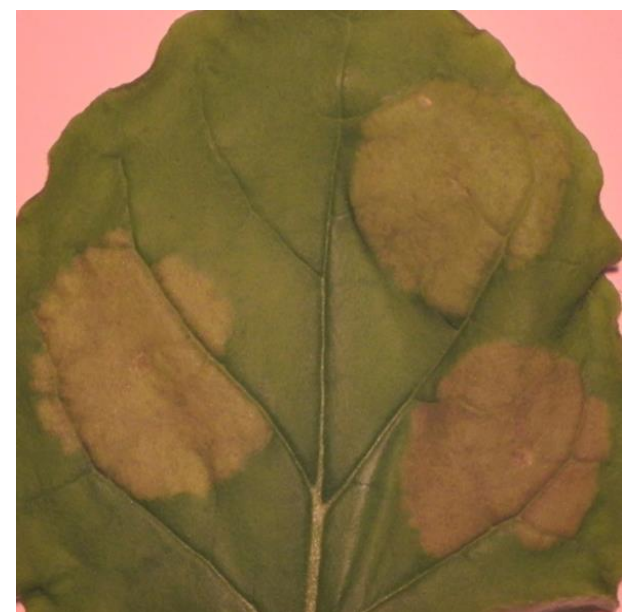

*Nicotiana benthamiana*
