# Supplementary material for: Expression and Anthocyanin Biosynthesis-Modulating Potential of Sweet Cherry (Prunus avium L.) MYB10 and bHLH Genes
Source: PubMed Central journal article supplement (PMC4433224; doi:10.1371/journal.pone.0126991), 2015-05-15
Supplement: pone.0126991.s004.pdf [file pone.0126991.s004.pdf]

## Primers for cloning of genes

| Name                                                            | Sequence                                                      |
|-----------------------------------------------------------------|---------------------------------------------------------------|
| <b>For cloning of full-length Myb10 genes</b>                   |                                                               |
| PrPro_99-72d                                                    | ATCCCTTTATTTATAATGCTAGGTGGCTTC                                |
| PrCDS_2223-2196r                                                | CTATTCTTCTTTTGAATGATTCCAAAGG                                  |
| <b>Primer for 3'-RACE-ready cDNA synthesis</b>                  |                                                               |
| 3-RACE-CDS-A                                                    | AAGCAGTGGTATCAACGCAGAGTACTTTTTTTTTTTTTTTTTTTTTTTTTTTTTTTTTTVN |
| <b>Primer for 5'RACE-ready and qPCR cDNA synthesis</b>          |                                                               |
| HOUSE_A                                                         | CACGGTCCATCGCAGCAGTCACTTTTTTTTTTTTTTTTTTTTTTTTTTTTTTTTTTVN    |
| <b>Template Switch Oligo</b>                                    |                                                               |
| SMART-C3                                                        | AAGCAGTGGTATCAACGCAGAGTACATGGGG-C3spacer                      |
| <b>Nonspecific (for target gene) primers for 3' and 5'-RACE</b> |                                                               |
| UPM = UPM-Long-A + UPM-Short-A                                  |                                                               |
| UPM-Long-A                                                      | CTAATACGACTCACTATAGGGCAAGCAGTGGTATCAACGCAGAGT                 |
| UPM-Short-A                                                     | CTAATACGACTCACTATAGGGC                                        |
| NUP-A                                                           | AAGCAGTGGTATCAACGCAGAGT                                       |
