# Supplementary material for: Expression and Anthocyanin Biosynthesis-Modulating Potential of Sweet Cherry (Prunus avium L.) MYB10 and bHLH Genes
Source: PubMed Central journal article supplement (PMC4433224; doi:10.1371/journal.pone.0126991), 2015-05-15
Supplement: pone.0126991.s005.pdf [file pone.0126991.s005.pdf]

## Primers for qPCR

| Direct  |                              | Reverse |                                | Target mRNA       |
|---------|------------------------------|---------|--------------------------------|-------------------|
| Name    | Sequence                     | Name    | Sequence                       |                   |
| ACTd    | CAACTATGTTCCCCGGTATTGC       | ACTr    | CCCTTGGAATCCACATCTGC           | Actin V1          |
| PALd    | CTACATCGACGACCCCTGC          | PALr    | CCCTTGCACTATCCACCTCT           |                   |
| CHSd    | GCCCAGCAATTCTAGACCAAG        | CHSr    | CCCCAATCCAGTCCATCTCC           | CHS               |
| CHId    | CACTGATGCAGAAGCCAAGG         | CHIr    | TTGGGAGATTGTGTGAAAAGGA         | CHI               |
| F3Hd    | GTTCAACCAGTGGAAGGAGC         | F3Hr    | TGAGTTCACAACCTGCTTGGTG         | F3H               |
| F3'Hd   | TAATGGCTGCAACCCTGGTCC        | F3'Hd   | GCTTTGTATGCATGAGGGGCTAG        | DFR               |
| DFRd    | ATGACTGGTTGGATGTACTTCG       | DFRr    | GATGAGGCTTGGTGGCATG            | DFR               |
| ANSd    | CCACAACATGGTTCCTGGC          | ANSr    | CCTTCTCCTTGTTCCACCATTCC        | ANS               |
| UFGTd   | GCCTTCGTAACGCACTGC           | UFGTr   | ATCTCCAACACGTCCTCCAC           | UFGT              |
| WD40d   | CTTCGATTTGCGGGACAAGG         | WD40r   | CCATGTACCTCAGGTCCTGC           | WD40              |
| bHLH33d | GCTCACTCAGTCCAATCATCC        | bHLH33d | CGCTGCTCCTCGAACTTTG            | bHLH33            |
| bHLH3d  | AGAGTGACGGGTTGTTGGAG         | bHLH3r  | CCCTCAGCTCAGCTACGAAG           | bHLH3             |
| V0d     | GCCAAATATCAAGAGAGGAGACTTTATG | V2r     | ATCATTTCGCAGTCCTTCTGGAAGTCTTTG | MYB10.2 (V0-V0)   |
| V1d     | TCAAGATAGGAGGGTTTGCAGAG      | V1r     | ATCATTTCGCTGTCCTTCTGGAAGCCTTCC | MYB10.1 (V1-V1)   |
| V2d     | ATCGTAATAAGACCTCAACCCCA      | V2r     | CTCGACCGTTTGAATATGGTCC         | MYB10.1-1 (V2-V2) |
| V3d     | CCATCATAATAAGACCTCAACCACG    | V3r     | CTCAACTGTTTGAATATGGGGTTC       | MYB10.1-3 (V3-V3) |
