# Supplementary material for: Expression and Anthocyanin Biosynthesis-Modulating Potential of Sweet Cherry (Prunus avium L.) MYB10 and bHLH Genes
Source: PubMed Central journal article supplement (PMC4433224; doi:10.1371/journal.pone.0126991), 2015-05-15
Supplement: pone.0126991.s006.pdf [file pone.0126991.s006.pdf]

## Primers for construction of plasmids for transient gene expression

| <b>Name</b>                             | <b>Sequence</b>                                                              | <b>Gene</b>                 |
|-----------------------------------------|------------------------------------------------------------------------------|-----------------------------|
| <b>P84f NruI</b><br><b>P84r NotI</b>    | ATCGCGAATGGAGAACTCAGCACAAG<br>TGCGGCCGCTCAAACCTTCAAAGC                       | PaWD40                      |
| <b>P253f PvuII</b><br><b>P253r NotI</b> | ACAGCTGATGGCTGCACCGCCAAGCAG<br>AGCGGCCGCCTAGGAATCAGATTGGGGAA                 | PabHLH3                     |
| <b>P261f NruI</b><br><b>P261r NotI</b>  | ATCGCGAATGGCCAATGGTACTCAAACCA<br>AGCGGCCGCTCAACTTACCGGCAATTT                 | PabHLH33                    |
| <b>P398f NruI</b><br><b>P398r NotI</b>  | ATCGCGAATGGAGGGCTATAACTTGGG<br>AGCGGCCGCCTATTCTTCTTTTGAATGAT                 | PaMYB10.1-2,<br>PaMYB10.1-3 |
| <b>P398f NruI</b><br><b>P229r NotI</b>  | ATCGCGAATGGAGGGCTATAACTTGGG<br>AGCGGCCGCCTATTCTTTTTTTAATGATT                 | PaMYB10.1-1                 |
| <b>ANT1f</b><br><b>ANT1r</b>            | AGGTCTCACATGAACAGTACATCTATGTCTTCAT<br>AGGTCTCTAAGCTTAATCAAGTAGATTCCATAAGTCAA | SIANT1                      |
| <b>PAP1f SmaI</b><br><b>PAP1r NotI</b>  | AATTTAAATGGAGGGTTCGTCCAAAGGG<br>AGCGGCCGCTAATCAAATTTACAGTCTCTCCATC           | AtPAP1                      |
