# Supplementary material for: Expression and Anthocyanin Biosynthesis-Modulating Potential of Sweet Cherry (Prunus avium L.) MYB10 and bHLH Genes
Source: PLoS One. 2015 May 15;10(5):e0126991. doi: 10.1371/journal.pone.0126991 (PMC4433224; doi:10.1371/journal.pone.0126991)
Supplement: S1 Fig — (PDF) [file pone.0126991.s001.pdf]

# Primers for qPCR of PaMYB10 gene variants

174

297

V1d

V1r

MYB10.1-1 >1,5kb 9k  
 MYB10.1-1 >1,5kb 5x  
 MYB10.1-1 >1,5kb 11x  
 MYB10.1-1/2 >1,5kb 2x  
 MYB10.1-3 >3kb 11x  
 MYB10.1-3 >3kb 5x  
 MYB10.1-2x >2kb +x 2x  
 MYB10.3 Pa\_1 2784

V0d

MYB10.1-2 >2kb + 2x  
 MYB10.1-2 >2kb + 5x  
 MYB10.1-2 >2kb + 9x

V0r

MYB10.2 >2kb 11x  
 MYB10.2 >2kb 5x  
 MYB10.2 >2kb 2x  
 MYB10.2 >2kb 9x

383

477

V2d

V2r

MYB10.1-1 >1,5kb 9k  
 MYB10.1-1 >1,5kb 5x  
 MYB10.1-1 >1,5kb 11x  
 MYB10.1-1/2 >1,5kb 2x

V3d

V3r

MYB10.1-3 >3kb 11x  
 MYB10.1-3 >3kb 5x  
 MYB10.1-2 >2kb + 2x  
 MYB10.1-2 >2kb + 5x  
 MYB10.1-2 >2kb + 9x  
 MYB10.1-2x >2kb +x 2x  
 MYB10.2 >2kb 11x  
 MYB10.2 >2kb 5x  
 MYB10.2 >2kb 2x  
 MYB10.2 >2kb 9x  
 MYB10.3 Pa\_1 2784

2x – Regina gene  
 5x – Werdersche braune gene  
 9x – Kitayanka gene  
 9k – Kitayanka cDNA  
 11x – Irema BS gene  
 Pa\_12784 – Regina cDNA from RNA-Seq
